# Supplementary material for: Prioritization, Identification, and Quantification of Emerging Contaminants in Recycled Textiles Using Non-Targeted and Suspect Screening Workflows by LC-ESI-HRMS
Source: PubMed Central journal article supplement (PMC11375621; doi:10.1021/acs.analchem.4c02041), 2024-08-20
Supplement: ac4c02041_si_001.pdf [file ac4c02041_si_001.pdf]

# SUPPORTING INFORMATION

1  
2  
3  
4  
5  
6  
7  
8  
9  
10  
11  
12  
13  
14

## **Prioritisation, Identification, and Semi-Quantification of Emerging Contaminants in Textiles Using Non Target and Suspect Screening Workflows by LC-ESI-HRMS**

Drew Szabo<sup>1</sup>, Stellan Fischer<sup>2</sup>, Aji P. Mathew<sup>1</sup>, Anneli Kruve<sup>1\*</sup>

<sup>1</sup>Department of Materials and Environmental Chemistry (MMK), Stockholm University, Svante Arrhenius Väg 16, SE-11418 Stockholm, Sweden

<sup>2</sup>Swedish Chemicals Agency (Kemi), SE-17267 Stockholm, Sweden

### **Contents**

|                                               |    |
|-----------------------------------------------|----|
| Textile Extraction Solvent Optimization ..... | S2 |
| Extraction Evaluation and Performance .....   | S3 |
| Workflow Parameters .....                     | S5 |

## 15 ***Textile Extraction Solvent Optimization***

16 Textile samples were selected independently from the study and were comprised of 100% virgin  
17 cotton. Triplicate samples of 1 x 1 cm were weighed and imaged under 55x magnification to  
18 determine the density (grams per square meter, GSM) and thread count (warps and wefts per  
19 square centimeter) (Table S8).

*Table S9: Summary of density and thread count characteristics for cotton textile sample.*

| <b>Textile</b> | <b>Density (g m<sup>-2</sup>; GSM)</b> | <b>Thread count (count cm<sup>-2</sup>)</b> |
|----------------|----------------------------------------|---------------------------------------------|
| 100% Cotton    | 339 ± 29                               | weft: 16 ± 0.82<br>warp: 11 ± 0.47          |

20

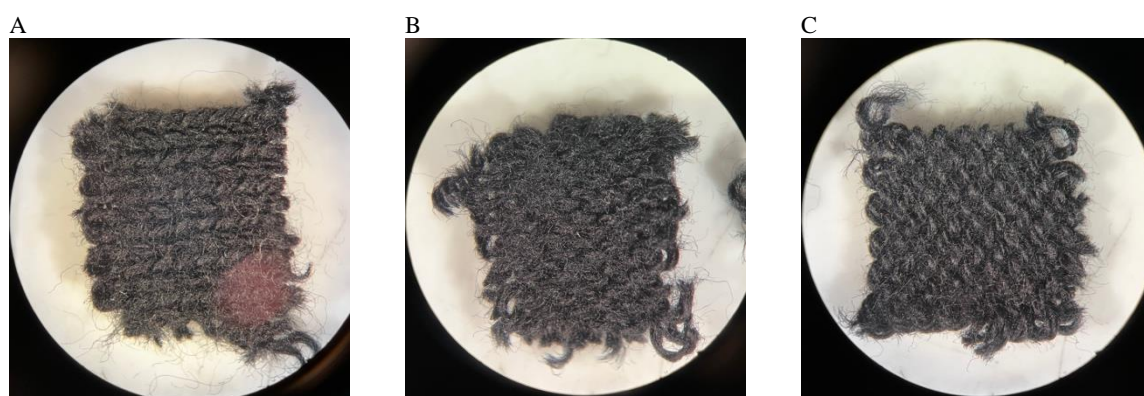

*Figure S1: Magnified images (55x) of triplicate cotton textile samples for thread count characterisation.*

21

22 A multi-residue approach was tested to extract the highest number of detectable organic  
23 contaminants from the textiles using different proportions of methanol and acetonitrile. The  
24 solvents selected for extraction were: i) methanol, ii) 1:1 methanol & acetonitrile, and iii)  
25 acetonitrile. Briefly, 5 mL solvent was added to a 15 mL glass vial containing 1 cm<sup>2</sup> textile  
26 sample and sonicated for 30 minutes. The supernatant was decanted to a new 15 mL glass vial  
27 and the extraction was repeated with a further 5 mL solvent and 30 minute sonication. The  
28 supernatants from both extractions were combined and evaporated to dryness at room  
29 temperature under a stream of nitrogen gas. 1.00 mL of solvent was added to each vial to  
30 reconstitute the mixture and was filtered (0.20 µm, PES) into a 1 mL glass autosampling vial

31 for analysis. Acquisition and data processing was performed using method described in Section  
32 2.3 and 2.4 respectively.

### 33 ***Extraction Evaluation and Performance***

34 The total number of features were evaluated for each of the extraction solvents: methanol,  
35 acetonitrile and a 1:1 mixture. A total of 4,936 unique features were detected using all solvents,  
36 where 2,298 were detected with methanol, 2,612 were detected with acetonitrile, and 3,519  
37 were detected with the mixture. 908 features were common between the extraction solvents,

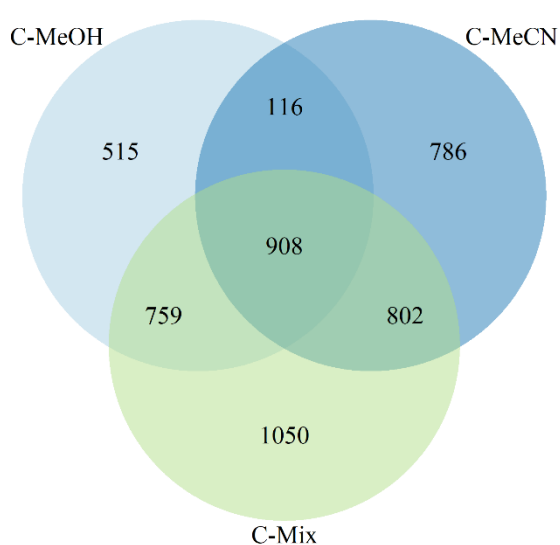

Figure S2: Number of features detected from textiles extracted with methanol (MeOH), acetonitrile (MeCN) and an equal mixture.

38

39 The majority of the 4,936 features with extractable MS<sup>1</sup> peaks were distributed between 100 –  
40 1,000 *m/z* for all solvent types. Furthermore, most of the extractable features were eluted from  
41 the column throughout the 25 minute run time as the organic phase was increased to 100%  
42 (Figure S3-A). There were more chemicals with mass <500 Da that were extracted by  
43 methanol, compared with the mixture and acetonitrile. However there were more chemicals  
44 with mass >500 Da that were extracted with acetonitrile. Similarly, methanol provided greater  
45 extraction for chemicals with earlier eluting times, and acetonitrile had greater extraction for

46 late eluting chemicals. The mixture provided a balanced extraction of chemicals from high and  
47 low  $m/z$  and RT.

48 A total of 1,957 features had MS<sup>2</sup> acquired and were structurally annotated by SIRIUS: CSI  
49 FingerID. The predicted hydrophobicity of each feature was then calculated and was  
50 distributed around a mean of 5 log units (Figure S3-B). Methanol was more effective at  
51 extracting chemicals with  $\log P$  between 0 – 10, however, acetonitrile and the mixture were  
52 more effective at extracting chemicals with  $\log P > 10$ . Again, the mixture provided a balanced  
53 extraction solvent compared to using methanol or acetonitrile individually.

54

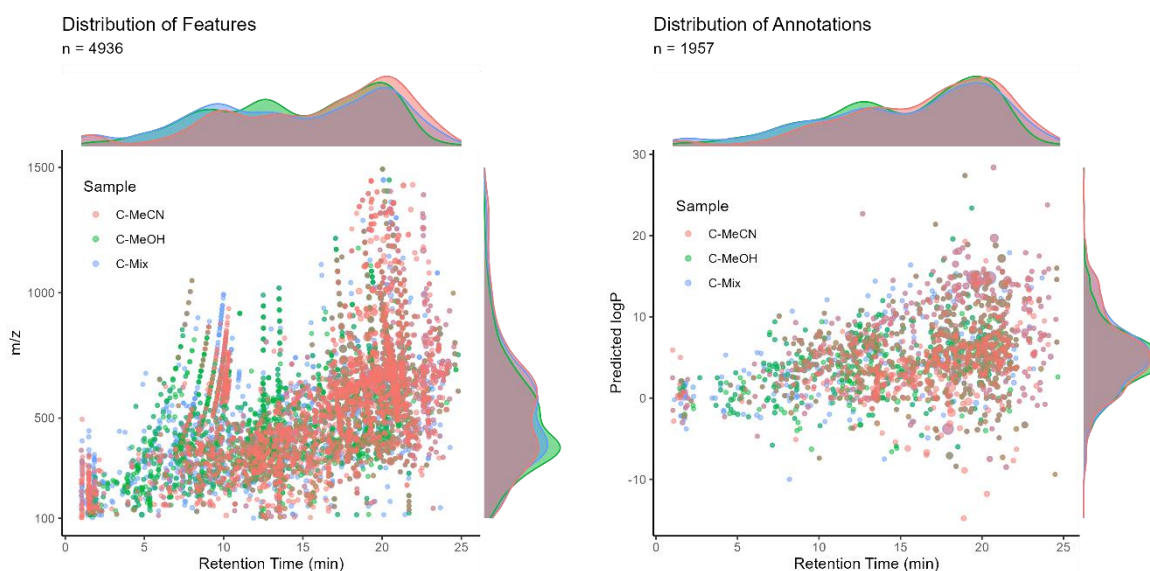

Figure S3: Distribution of total features (left) and features annotated by SIRIUS CSI:FingerID (right) for cotton textile sample extracted with methanol (MeOH), acetonitrile (MeCN) and a mixture.

55 The mixture of methanol and acetonitrile was selected to perform the extractions of organic  
56 chemicals from recycled textile samples in this study. The selection of solvents is far from a  
57 complete extraction optimisation, further investigation is required to optimise the ratio of  
58 solvents, and other parameters such as the temperature and duration. This methodology  
59 provided a safe and effective extraction methodology that requires no clean up or filtering to  
60 ensure little to no chemical loss during the process.

61 **Workflow Parameters**

62 XCMS was used for peak picking using the *CentWave* algorithm, then grouping was performed  
 63 with the *PeakDensity* and *Obiwrap* functions respectively. *mzR* was then used to perform peak  
 64 extraction of each feature, where the average MS<sup>1</sup> and MS<sup>2</sup> peak lists were used for structural  
 65 annotation (Table S9).

*Table S10: Parameters used in peak picking and grouping with XCMS, and peak extraction with mzR packages.*

| <b>Parameter</b>   | <b>Value</b> |
|--------------------|--------------|
| <i>CentWave</i>    |              |
| ppm                | 5            |
| peakwidth          | 10 – 60      |
| snthresh           | 3            |
| prefilter          | 3, 100       |
| mzCenterFun        | wMean        |
| intergrate         | 1            |
| mzdiff             | 0.005        |
| Noise              | 1000         |
| <i>PeakDensity</i> |              |
| minFraction        | 0            |
| minSamples         | 1            |
| bw                 | 15           |
| binSize            | 0.01         |
| <i>Obiwrap</i>     |              |
| response           | 1            |
| gapInit            | 0.3          |
| gapExtend          | 2.4          |
| factorDiag         | 2            |
| factorGap          | 1            |
| binSize            | 0.05         |
| <i>mzR</i>         |              |
| maxMSRtWindow      | 5            |
| precursorMzWindow  | 0.2          |
| clusterMzWindow    | 0.005        |
| topmost            | 250          |
| maxIsotopes        | 4            |
| mzDefectRange      | -0.1 – 0.1   |

66

67

68 Structural annotation of features with acquired MS<sup>2</sup> were matched with the MassBank library,  
69 and predicted using MetFrag and SIRIUS. MS<sup>1</sup> error were kept the same between each  
70 algorithm to provide consistency in analysis. The MS<sup>2</sup> error is measured in ppm for SIRIUS  
71 and then mDa for MetFrag and library matches. Only the top 5 compounds were computed and  
72 saved, where the top 1 compound was filtered for the final analysis (Table S10).

*Table S11: Parameters used for structural annotation using library and in silico tools SIRIUS and MetFrag.*

| <b>Parameter</b>    | <i>SIRIUS</i> | <i>MetFrag</i> | <i>Library</i> |
|---------------------|---------------|----------------|----------------|
| Library             | PubChem       | PubChemLite    | MassBank       |
| MS1 error           | 5 ppm         | 5 ppm          | 5 ppm          |
| MS2 error           | 50 ppm        | 20 mDa         | 20 mDa         |
| cores               | 4             | NA             | NA             |
| topMost             | 5             | 5              | 5              |
| elements            | CHONPSFCIBr   | NA             | NA             |
| maxCandidatesToStop | NA            | 2500           | NA             |

73
